# Supplementary material
Source: ML conference proceedings conference paper supplement (https://openaccess.thecvf.com/content/ICCV2025/html/Zheng_World4Drive_End-to-End_Autonomous_ICCV_2025_paper.html)
Supplement: Supplementary file 1 [file Zheng_World4Drive_End-to-End_Autonomous_ICCV_2025_supplemental.pdf]

# World4Drive: End-to-End Autonomous Driving via Intention-aware Physical Latent World Model

## Supplementary Material

### 1. Detailed Implementation

#### 1.1. nuScenes Benchmark

##### 1.1.1. Detailed Metrics

Following prior methods, nuScenes evaluates trajectories using **L2 Error** and **Collision Rate**. The **L2 Error** measures the distance between the planned trajectory and the human-driven trajectory. The **Collision Rate** measures how frequently the planned trajectory collides with other agents on the road.

##### 1.1.2. Data Processing Pipeline

In nuScenes experiments, the original 6-surround-view images have a resolution of  $900 \times 1600$ . They are first resized to  $360 \times 640$ , then padded to a final input size of  $384 \times 640$ , yielding  $I_t^{img} \in \mathbb{R}^{6 \times 3 \times 384 \times 640}$ . After processing through the image backbone network, the image features are down-sampled to a spatial resolution of  $12 \times 20$ , producing a feature  $I_t^f \in \mathbb{R}^{6 \times 240 \times 256}$ , which serves as the input for subsequent network layers.

#### 1.2. NAVSIM Benchmark

##### 1.2.1. Detailed Metrics

NAVSIM evaluates trajectories using PDMS, with the specific evaluation formula given as:

$$\text{PDMS} = \text{NC} \times \text{DAC} \times \frac{(5 \times \text{EP} + 5 \times \text{TTC} + 2 \times \text{Comf.})}{12} \quad (1)$$

NC and DAC serve as multiplicative factors for other evaluation metrics. NC assesses the likelihood of the ego vehicle colliding with other agents, while DAC evaluates whether the predicted future trajectory remains within the drivable region. Other metrics are aggregated through a weighted summation. EP quantifies the ego vehicle’s anticipated driving distance along the designated route within the next 4 seconds. TTC measures the safety of the current state by estimating the time required for a potential collision with other agents if the vehicle maintains its present motion state. Comf. assesses driving smoothness by analyzing acceleration, heading changes, and other dynamic factors.

##### 1.2.2. Data Processing Pipeline

In the NAVSIM experiments, the input features consist of ego status  $e_t$  and image information  $I_t^{final} \in \mathbb{R}^{3 \times 256 \times 1024}$ .  $e_t$  is a vector of  $[c_t, v_t, a_t]$ , where  $v_t$  and  $a_t$  denote the ego vehicle’s velocity and acceleration at time  $t$ , and  $c_t$  is a one-hot encoded vector indicating the control command (left

Table 1. Ablation study of timestamp interval

| Timestamp interval $n$ | L2 (m) ↓    | Collision (%) ↓ |
|------------------------|-------------|-----------------|
| 1                      | 0.55        | 0.35            |
| 3                      | <b>0.50</b> | <b>0.16</b>     |
| 6                      | 0.52        | 0.24            |

turn, right turn, or straight). The image input, originally of size  $I_t^{\text{raw}} \in \mathbb{R}^{3 \times 1080 \times 1920}$ , undergoes a structured pre-processing pipeline. The front view is vertically cropped, resulting in  $I_t^f \in \mathbb{R}^{3 \times 1024 \times 1920}$ , while the left and right views are cropped along both height and width dimensions, yielding  $I_t^l, I_t^r \in \mathbb{R}^{3 \times 1024 \times 1088}$ . The processed views are then concatenated along the width dimension, forming

$$I_t^{\text{concat}} = \text{Concat}(I_t^l, I_t^f, I_t^r) \quad (2)$$

Finally, the concatenated image is resized to

$$I_t^{\text{final}} = \text{Resize}(I_t^{\text{concat}}, (3, 256, 1024)) \quad (3)$$

### 2. Additional Experimental Results

#### 2.1. Ablation of Timestamp Interval

In this section, we investigate the impact of varying the timestamp interval  $n$  of the input data on model performance. Table 1 shows the quantitative results of our ablation experiments.

As shown in Table 1, the model achieves optimal performance when the timestamp interval is set to 3, obtaining the lowest L2 error of 0.50 meters and the lowest collision rate of 0.16%. Increasing the interval to 6 results in a slight performance degradation, with the L2 error rising to 0.52 meters and the collision rate increasing to 0.24%. Conversely, using a very short interval ( $n = 1$ ) also negatively affects performance, causing an increase in both L2 error (0.55 meters) and collision rate (0.35%).

Experimental results show that the best performance is achieved when  $n = 3$ . We argue that when  $n$  is too small, the scene information lacks significant variation, preventing the model from capturing sufficient contextual temporal information. On the other hand, when the timestamp span is too large, the model’s assessment of future scenes becomes less accurate.

#### 2.2. Ablation of Reconstruction Losses

Table 2 presents an ablation study evaluating the influence of different reconstruction losses, specifically Mean

(a) Turn Left

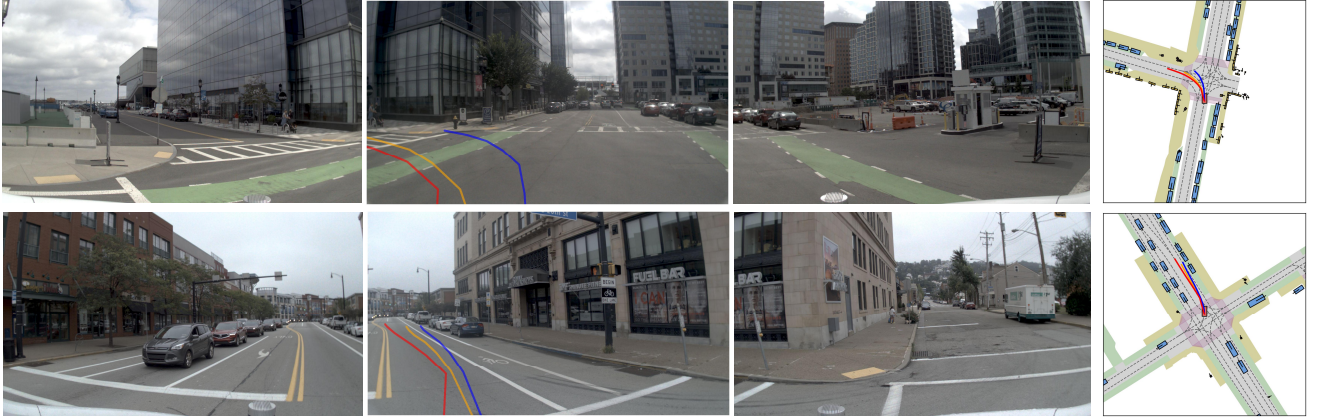

(b) Turn Right

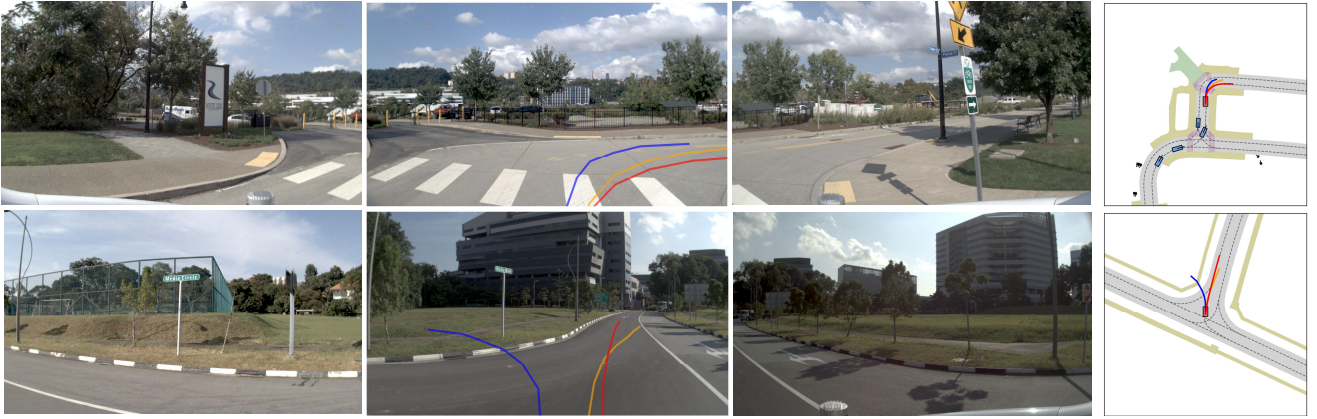

(c) Go Straight

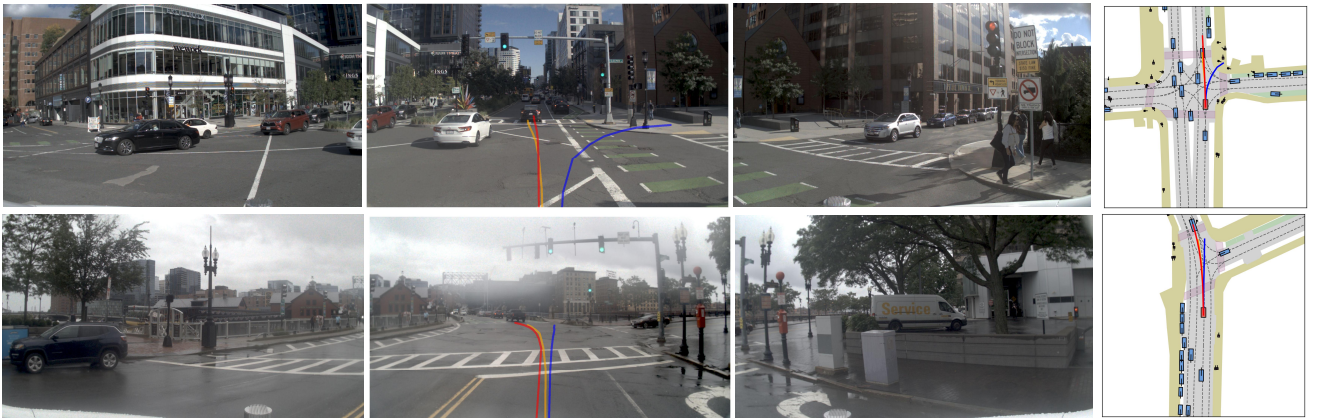

Figure 1. Red trajectory is ground-truth, while orange and blue trajectories are generated by World4Drive and LAW [? ].

Squared Error (MSE), Kullback-Leibler (KL) divergence, and Cosine similarity loss. In general, the choice of reconstruction loss has a relatively minor impact on the model's

overall performance. Thus, We choose the MSE loss as the reconstruction loss.

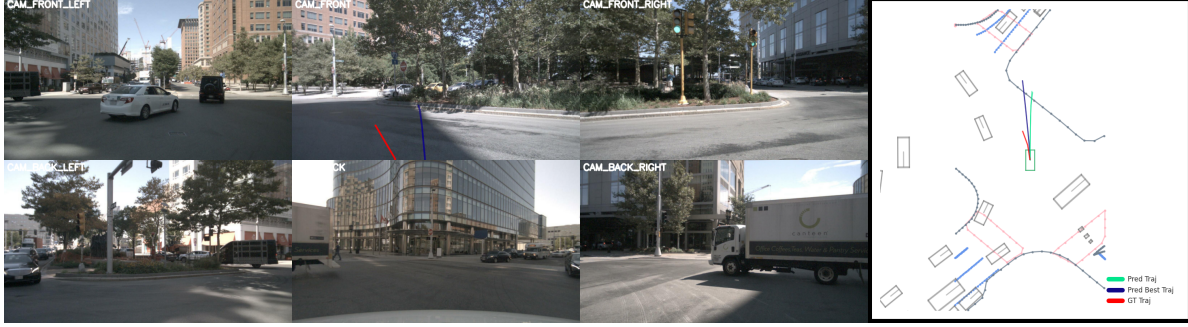

Figure 2. Red trajectory is ground-truth. Green trajectories and blue trajectory are generated by World4Drive, while blue one is the best one selected by world model.

Table 2. Ablation study of reconstruction losses

| ID | Mse | KL | Cosine | L2(m)↓      | Collision(%) ↓ |
|----|-----|----|--------|-------------|----------------|
| 1  | ✓   |    |        | 0.50        | 0.16           |
| 2  |     | ✓  |        | 0.50        | 0.17           |
| 3  |     |    | ✓      | 0.52        | 0.20           |
| 4  | ✓   | ✓  |        | 0.51        | 0.18           |
| 5  | ✓   |    | ✓      | 0.51        | 0.19           |
| 6  | ✓   | ✓  | ✓      | <b>0.50</b> | <b>0.16</b>    |

Table 3. Ablation study of Metric Depth Models

| Metric Depth Model  | L2 (m) ↓    | Collision (%) ↓ |
|---------------------|-------------|-----------------|
| Metirc3D v1 Convtny | 0.50        | 0.19            |
| Metirc3D v2 Small   | 0.51        | 0.20            |
| Metirc3D v2 Giant   | <b>0.50</b> | <b>0.16</b>     |

### 2.3. Ablation of Metric Depth Models

In this section, we explore how different metric depth models affect the model’s performance. Table 3 summarizes our findings. We observe that all tested depth models (Convtny, Small, Giant) achieve comparable performance. Specifically, both the Convtny and Giant models achieve the lowest L2 error of 0.50 meters, while the giant model slightly outperforms in collision rate (0.16%) compared to Convtny (0.19%) and small (0.20%). However, the performance differences among these depth models are minimal. This indicates that while the inclusion of metric depth information significantly improves overall model performance, the model’s complexity or size is not the primary determinant of accuracy or collision avoidance capabilities. Thus, even simpler depth models can provide sufficient spatial context to achieve similar trajectory prediction results. Given that the performance of different depth models is comparable, in practical deployment, an appropriate depth model can be selected based on specific computational requirements.

## 3. Additional Qualitative Results

### 3.1. More Visualization

We provide high-quality visualizations on NASIM benchmarks, as shown in Figure 1. We present a comparison between LAW and World4Drive in scenarios involving left turns, right turns, and straight driving. Compared to LAW, World4Drive demonstrates a stronger alignment with the ground-truth trajectory. Additionally, World4Drive is better able to capture scene information, particularly in determining whether the driving trajectory lies within the drivable area.

### 3.2. Failure Case

We present failure cases of World4Drive on NuScenes in Figure 2, showing low-quality trajectories under incorrect driving commands. We found misannotations in NuScenes, such as a left-turn scene labeled as go-straight in Figure 2, making it difficult to generate accurate trajectory.
